# Supplementary material for: When to Cheat: Modeling Dynamics of Paternity and Promiscuity in Socially Monogamous Prairie Voles (Microtus ochrogaster)
Source: PubMed Central journal article supplement (PMC8248529; doi:10.3389/fevo.2018.00141), 2018-09-19
Supplement: NIHMS1609269-supplement-supplementary_material_-_Table_1.pdf [file NIHMS1609269-supplement-supplementary_material_-_Table_1.pdf]

**Condition 1.**

Reproductive success for simulated roving focal male in Condition 1 at pair population 6 at each percentage of roving by other males in the population.

| <b>Pair Population 6</b>     | <b>0%</b> | <b>16.67%</b> | <b>33.3%</b> | <b>50%</b> | <b>66.67%</b> | <b>83.3%</b> | <b>100%</b> |
|------------------------------|-----------|---------------|--------------|------------|---------------|--------------|-------------|
| <b>Average Total R</b>       | 4.00      | 4.00          | 3.93         | 3.94       | 3.98          | 4.06         | 4.17        |
| <b>Average IPC</b>           | 4.00      | 4.00          | 3.13         | 2.48       | 1.95          | 1.55         | 1.19        |
| <b>Average EPC</b>           | 0.00      | 0.00          | 0.80         | 1.46       | 2.03          | 2.51         | 2.98        |
| <b>Average C</b>             | 0.00      | 0.00          | 0.86         | 1.52       | 2.04          | 2.45         | 2.81        |
| <b><math>\Delta R</math></b> | 0.00      | 0.00          | -0.06        | -0.05      | -0.01         | 0.06         | 0.17        |

**Condition 1.**

Reproductive success (R) for simulated roving focal male in Condition 1 at pair population 100 at each percentage of roving by other males in the population.

| <b>Pair Population 100</b>   | <b>0%</b> | <b>10%</b> | <b>20%</b> | <b>30%</b> | <b>40%</b> | <b>50%</b> | <b>60%</b> | <b>70%</b> | <b>80%</b> | <b>90%</b> | <b>100%</b> |
|------------------------------|-----------|------------|------------|------------|------------|------------|------------|------------|------------|------------|-------------|
| <b>Average Total R</b>       | 4.00      | 4.01       | 3.99       | 4.09       | 4.07       | 4.17       | 4.24       | 4.32       | 4.38       | 4.47       | 4.59        |
| <b>Average IPC</b>           | 4.00      | 3.58       | 3.15       | 2.83       | 2.48       | 2.22       | 1.94       | 1.71       | 1.54       | 1.36       | 1.20        |
| <b>Average EPC</b>           | 0.00      | 0.43       | 0.84       | 1.26       | 1.59       | 1.95       | 2.30       | 2.61       | 2.84       | 3.11       | 3.39        |
| <b>Average C</b>             | 0.00      | 0.42       | 0.85       | 1.16       | 1.51       | 1.77       | 2.06       | 2.29       | 2.46       | 2.63       | 2.79        |
| <b><math>\Delta R</math></b> | 0.00      | -0.01      | -0.01      | 0.09       | 0.07       | 0.17       | 0.24       | 0.32       | 0.38       | 0.47       | 0.59        |

**Condition 1.**

Reproductive success for simulated roving focal male in Condition 1 at pair population 200 at each percentage of roving by other males in the population.

| <b>Pair Population 200</b>   | <b>0%</b> | <b>10%</b> | <b>20%</b> | <b>30%</b> | <b>40%</b> | <b>50%</b> | <b>60%</b> | <b>70%</b> | <b>80%</b> | <b>90%</b> | <b>100%</b> |
|------------------------------|-----------|------------|------------|------------|------------|------------|------------|------------|------------|------------|-------------|
| <b>Average Total R</b>       | 4.00      | 3.99       | 4.02       | 4.10       | 4.10       | 4.18       | 4.22       | 4.34       | 4.43       | 4.47       | 4.56        |
| <b>Average IPC</b>           | 4.00      | 3.57       | 3.16       | 2.81       | 2.49       | 2.22       | 1.94       | 1.73       | 1.55       | 1.34       | 1.21        |
| <b>Average EPC</b>           | 0.00      | 0.42       | 0.86       | 1.29       | 1.61       | 1.96       | 2.28       | 2.61       | 2.88       | 3.13       | 3.35        |
| <b>Average C</b>             | 0.00      | 0.42       | 0.84       | 1.19       | 1.51       | 1.77       | 2.05       | 2.26       | 2.45       | 2.65       | 2.78        |
| <b><math>\Delta R</math></b> | 0.00      | -0.01      | 0.02       | 0.10       | 0.10       | 0.18       | 0.22       | 0.34       | 0.43       | 0.47       | 0.56        |

**Condition 1.**

Reproductive success for simulated roving focal male in Condition 1 at pair population 300 at each percentage of roving by other males in the population.

| <b>Pair Population 300</b> | <b>0%</b> | <b>10%</b> | <b>20%</b> | <b>30%</b> | <b>40%</b> | <b>50%</b> | <b>60%</b> | <b>70%</b> | <b>80%</b> | <b>90%</b> | <b>100%</b> |
|----------------------------|-----------|------------|------------|------------|------------|------------|------------|------------|------------|------------|-------------|
| <b>Average Total R</b>     | 4.00      | 3.99       | 4.04       | 4.04       | 4.10       | 4.18       | 4.27       | 4.36       | 4.39       | 4.49       | 4.58        |
| <b>Average IPC</b>         | 4.00      | 3.56       | 3.17       | 2.79       | 2.46       | 2.21       | 1.95       | 1.74       | 1.52       | 1.36       | 1.20        |
| <b>Average EPC</b>         | 0.00      | 0.43       | 0.87       | 1.25       | 1.64       | 1.97       | 2.32       | 2.62       | 2.87       | 3.13       | 3.38        |
| <b>Average C</b>           | 0.00      | 0.44       | 0.83       | 1.20       | 1.54       | 1.79       | 2.04       | 2.25       | 2.48       | 2.64       | 2.79        |
| <b>ΔR</b>                  | 0.00      | -0.01      | 0.04       | 0.04       | 0.10       | 0.18       | 0.27       | 0.36       | 0.39       | 0.49       | 0.58        |

**Condition 1.**

Reproductive success for simulated roving focal male in Condition 1 at pair population 400 at each percentage of roving by other males in the population.

| <b>Pair Population 400</b> | <b>0%</b> | <b>10%</b> | <b>20%</b> | <b>30%</b> | <b>40%</b> | <b>50%</b> | <b>60%</b> | <b>70%</b> | <b>80%</b> | <b>90%</b> | <b>100%</b> |
|----------------------------|-----------|------------|------------|------------|------------|------------|------------|------------|------------|------------|-------------|
| <b>Average Total R</b>     | 4.00      | 4.01       | 4.01       | 4.13       | 4.11       | 4.19       | 4.23       | 4.32       | 4.44       | 4.48       | 4.57        |
| <b>Average IPC</b>         | 4.00      | 3.56       | 3.14       | 2.82       | 2.46       | 2.20       | 1.94       | 1.73       | 1.53       | 1.37       | 1.18        |
| <b>Average EPC</b>         | 0.00      | 0.45       | 0.87       | 1.31       | 1.65       | 1.99       | 2.29       | 2.59       | 2.91       | 3.11       | 3.39        |
| <b>Average C</b>           | 0.00      | 0.43       | 0.85       | 1.18       | 1.53       | 1.79       | 2.05       | 2.26       | 2.47       | 2.63       | 2.81        |
| <b>ΔR</b>                  | 0.00      | 0.01       | 0.01       | 0.13       | 0.11       | 0.19       | 0.23       | 0.32       | 0.44       | 0.48       | 0.57        |

**Condition 1.**

Reproductive success for simulated roving focal male in Condition 1 at pair population 500 at each percentage of roving by other males in the population.

| <b>Pair Population 500</b> | <b>0%</b> | <b>10%</b> | <b>20%</b> | <b>30%</b> | <b>40%</b> | <b>50%</b> | <b>60%</b> | <b>70%</b> | <b>80%</b> | <b>90%</b> | <b>100%</b> |
|----------------------------|-----------|------------|------------|------------|------------|------------|------------|------------|------------|------------|-------------|
| <b>Average Total R</b>     | 4.00      | 3.98       | 4.00       | 4.10       | 4.10       | 4.21       | 4.23       | 4.35       | 4.45       | 4.49       | 4.57        |
| <b>Average IPC</b>         | 4.00      | 3.54       | 3.13       | 2.80       | 2.48       | 2.20       | 1.91       | 1.73       | 1.56       | 1.36       | 1.20        |
| <b>Average EPC</b>         | 0.00      | 0.44       | 0.87       | 1.30       | 1.62       | 2.01       | 2.32       | 2.62       | 2.89       | 3.13       | 3.37        |
| <b>Average C</b>           | 0.00      | 0.45       | 0.86       | 1.19       | 1.52       | 1.80       | 2.08       | 2.26       | 2.44       | 2.63       | 2.79        |
| <b>ΔR</b>                  | 0.00      | -0.01      | 0.01       | 0.10       | 0.10       | 0.21       | 0.23       | 0.35       | 0.45       | 0.49       | 0.57        |

**Condition 2.**

Reproductive success for simulated roving focal male in Condition 2 at pair population 1000 with 20% wandering males at each percentage of roving by other males in the population.

| <b>Pair Population 1000<br/>with 20% Wanderers</b> | <b>0%</b> | <b>10%</b> | <b>20%</b> | <b>30%</b> | <b>40%</b> | <b>50%</b> | <b>60%</b> | <b>70%</b> | <b>80%</b> | <b>90%</b> | <b>100%</b> |
|----------------------------------------------------|-----------|------------|------------|------------|------------|------------|------------|------------|------------|------------|-------------|
| <b>Average Total R</b>                             | 4.00      | 3.25       | 3.28       | 3.37       | 3.46       | 3.59       | 3.68       | 3.83       | 3.88       | 4.00       | 4.15        |
| <b>Average IPC</b>                                 | 4.00      | 2.83       | 2.47       | 2.20       | 1.94       | 1.72       | 1.54       | 1.36       | 1.18       | 1.05       | 0.95        |
| <b>Average EPC</b>                                 | 0.00      | 0.42       | 0.81       | 1.17       | 1.52       | 1.87       | 2.14       | 2.47       | 2.70       | 2.95       | 3.20        |
| <b>Average C</b>                                   | 0.00      | 1.17       | 1.53       | 1.80       | 2.05       | 2.27       | 2.46       | 2.63       | 2.81       | 2.95       | 3.04        |
| <b><math>\Delta R</math></b>                       | 0.00      | -0.74      | -0.71      | -0.62      | -0.53      | -0.40      | -0.31      | -0.16      | -0.11      | 0.01       | 0.15        |

**Condition 2.**

Reproductive success for simulated roving focal male in Condition 2 at pair population 1000 with 30% wandering males at each percentage of roving by other males in the population.

| <b>Pair Population 1000<br/>with 30% Wanderers</b> | <b>0%</b> | <b>10%</b> | <b>20%</b> | <b>30%</b> | <b>40%</b> | <b>50%</b> | <b>60%</b> | <b>70%</b> | <b>80%</b> | <b>90%</b> | <b>100%</b> |
|----------------------------------------------------|-----------|------------|------------|------------|------------|------------|------------|------------|------------|------------|-------------|
| <b>Average Total R</b>                             | 4.00      | 2.87       | 2.97       | 3.13       | 3.18       | 3.32       | 3.45       | 3.59       | 3.69       | 3.84       | 3.94        |
| <b>Average IPC</b>                                 | 4.00      | 2.47       | 2.19       | 1.97       | 1.73       | 1.52       | 1.36       | 1.22       | 1.07       | 0.96       | 0.83        |
| <b>Average EPC</b>                                 | 0.00      | 0.40       | 0.78       | 1.16       | 1.45       | 1.80       | 2.09       | 2.37       | 2.62       | 2.88       | 3.11        |
| <b>Average C</b>                                   | 0.00      | 1.53       | 1.81       | 2.03       | 2.26       | 2.48       | 2.64       | 2.77       | 2.93       | 3.03       | 3.16        |
| <b><math>\Delta R</math></b>                       | 0.00      | -1.12      | -1.02      | -0.86      | -0.81      | -0.67      | -0.54      | -0.40      | -0.30      | -0.15      | -0.05       |

**Condition 3.**

Reproductive success for simulated roving focal male in Condition 3 at pair population 1000 with 20% wandering males and a balanced sex-ratio from unpaired females at each percentage of roving by other males in the population.

| <b>Pair Population 1000<br/>with 20% Wanderers</b> | <b>0%</b> | <b>10%</b> | <b>20%</b> | <b>30%</b> | <b>40%</b> | <b>50%</b> | <b>60%</b> | <b>70%</b> | <b>80%</b> | <b>90%</b> | <b>100%</b> |
|----------------------------------------------------|-----------|------------|------------|------------|------------|------------|------------|------------|------------|------------|-------------|
| <b>Average Total R</b>                             | 4.00      | 4.05       | 4.08       | 4.22       | 4.26       | 4.32       | 4.39       | 4.48       | 4.58       | 4.71       | 4.78        |
| <b>Average IPC</b>                                 | 4.00      | 2.81       | 2.46       | 2.21       | 1.93       | 1.71       | 1.52       | 1.35       | 1.19       | 1.07       | 0.96        |
| <b>Average EPC</b>                                 | 0.00      | 1.24       | 1.62       | 2.01       | 2.33       | 2.61       | 2.87       | 3.13       | 3.39       | 3.64       | 3.82        |
| <b>Average C</b>                                   | 0.00      | 1.19       | 1.53       | 1.78       | 2.06       | 2.28       | 2.48       | 2.64       | 2.81       | 2.93       | 3.04        |
| <b><math>\Delta R</math></b>                       | 0.00      | 0.05       | 0.08       | 0.22       | 0.26       | 0.32       | 0.39       | 0.48       | 0.58       | 0.71       | 0.78        |

**Condition 3.**

Reproductive success for simulated roving focal male in Condition 3 at pair population 1000 with 30% wandering males and a balanced sex-ratio from unpaired females at each percentage of roving by other males in the population.

| <b>Pair Population 1000<br/>with 30% Wanderers</b> | <b>0%</b> | <b>10%</b> | <b>20%</b> | <b>30%</b> | <b>40%</b> | <b>50%</b> | <b>60%</b> | <b>70%</b> | <b>80%</b> | <b>90%</b> | <b>100%</b> |
|----------------------------------------------------|-----------|------------|------------|------------|------------|------------|------------|------------|------------|------------|-------------|
| <b>Average Total R</b>                             | 4.00      | 4.15       | 4.19       | 4.24       | 4.31       | 4.38       | 4.44       | 4.57       | 4.69       | 4.81       | 4.88        |
| <b>Average IPC</b>                                 | 4.00      | 2.50       | 2.21       | 1.94       | 1.71       | 1.52       | 1.32       | 1.19       | 1.06       | 0.96       | 0.84        |
| <b>Average EPC</b>                                 | 0.00      | 1.65       | 1.98       | 2.30       | 2.60       | 2.86       | 3.12       | 3.38       | 3.63       | 3.85       | 4.04        |
| <b>Average C</b>                                   | 0.00      | 1.50       | 1.79       | 2.05       | 2.28       | 2.47       | 2.67       | 2.80       | 2.94       | 3.03       | 3.16        |
| <b><math>\Delta R</math></b>                       | 0.00      | 0.15       | 0.19       | 0.24       | 0.31       | 0.38       | 0.44       | 0.57       | 0.69       | 0.81       | 0.88        |

---

**Abbreviations:**

---

|                              |                                                                                 |
|------------------------------|---------------------------------------------------------------------------------|
| <b>Average Total R</b>       | Average reproductive success achieved via extra-pair and intra-pair copulations |
| <b>Average IPC</b>           | Average reproductive success achieved via intra-pair copulations                |
| <b>Average EPC</b>           | Average reproductive success achieved via extra-pair copulations                |
| <b>Average C</b>             | Average reproductive success lost via cuckolding                                |
| <b><math>\Delta R</math></b> | Total change in reproductive success                                            |

---
